1  
2 **Altered resting state EEG microstate dynamics in acute-phase pediatric**  
3 **mild traumatic brain injury**

4 Sahar Sattari<sup>1</sup>, Samir Damji<sup>2</sup>, Julianne McLeod<sup>3</sup>, Maryam S. Mirian<sup>4,5</sup>, Lyndia C. Wu<sup>1,6</sup>, Naznin  
5 Virji-Babul<sup>5,7\*</sup>

6 <sup>1</sup> School of Biomedical Engineering, Faculty of Applied Science, University of British Columbia,  
7 Vancouver, British Columbia, Canada

8 <sup>2</sup> Graduate Program in Neuroscience, Faculty of Medicine, University of British Columbia,  
9 Vancouver, British Columbia, Canada

10 <sup>3</sup> Department of Rehabilitation Sciences, Faculty of Medicine, University of British Columbia,  
11 Vancouver, British Columbia, Canada

12 <sup>4</sup> Pacific Parkinson's Research Centre, University of British Columbia, Vancouver, British  
13 Columbia, Canada

14 <sup>5</sup> Djavad Mowafaghian Centre for Brain Health, University of British Columbia, Vancouver,  
15 British Columbia, Canada

16 <sup>6</sup> Department of Mechanical Engineering, Faculty of Medicine, University of British Columbia,  
17 Vancouver, British Columbia, Canada

18 <sup>7</sup> Department of Physical Therapy, Faculty of Medicine, University of British Columbia,  
19 Vancouver, British Columbia, Canada

20 \* Corresponding author

21 E-mail: [nvb31@mail.ubc.ca](mailto:nvb31@mail.ubc.ca) (NVB)

## 22 Abstract

23 **Objective:** Sport-related concussion presents significant diagnostic and monitoring  
24 challenges, especially in youth populations. This study investigates the potential of EEG  
25 microstate analysis as a tool for assessing acute-phase brain activity changes in adolescent male  
26 athletes following a concussion. We analyzed resting-state EEG data from 32 participants in a  
27 between-subjects design, comparing participants with acute concussion (within two weeks of  
28 injury) to an age- and sex- matched sample with no reported history of concussion.

29 **Methodology:** We applied a modified k-means clustering algorithm to group resting-  
30 state EEG topographical maps into seven clusters, with each cluster represented by one of the  
31 canonical microstate classes (A-G). Average duration, occurrence rate, and time coverage for  
32 each microstate were extracted.

33 **Results:** Statistically significant differences in mean duration, occurrence rate, and time  
34 coverage of microstates B and E were observed. Specifically, the mean duration, occurrence and  
35 time coverage of microstate E showed a significant decrease in the concussed cohort in  
36 comparison to the controls ( $p < 0.001$ ). In addition, the mean duration, occurrence rate and time  
37 coverage was higher in the concussed cohort in comparison with the healthy cohort ( $p = 0.003$ ).  
38 A significant negative linear relationship was found between microstate E and symptom severity  
39 ( $p = 0.006$ ,  $F = 15.72$ ).

40 **Discussion:** These results suggest that mild traumatic brain injury may disrupt the  
41 dynamic interaction of large-scale brain networks, hinting at potential biomarkers of injury. This  
42 study may help to inform future work on objective, brain-based tools for diagnosis and recovery  
43 assessment in concussed adolescents. Further research in larger, more diverse populations is  
44 necessary to validate these potential biomarkers.

## 45 **Introduction**

46 The neurophysiological and neurobiological changes due to mild traumatic brain injury  
47 (mTBI; hereafter used synonymously with concussion) are not well understood. Concussion  
48 results from biomechanical forces exerted to the skull and the subsequent shearing and stretching  
49 of brain tissue; although this injury is particularly prevalent, concussion diagnosis remains a  
50 challenge due to its largely subjective nature and the absence of definitive clinical tests [1].

51 There is a need for objective, brain-based diagnostic methods that can reliably indicate the  
52 occurrence of a concussion [2,3]. The dynamic and complex nature of concussion injury is of  
53 particular concern in adolescents due to the complexity and heterogeneity of neurodevelopment.

54 In Canada, concussion incidence is highest among adolescents aged 12 to 19 compared to  
55 other age brackets across the lifespan; this result is corroborated by a similar epidemiological  
56 investigation of the US population [4,5]. It should be noted that most concussion injuries in this  
57 age group are sustained during sport (hockey, rugby, and football in particular) and other  
58 physical activities [4].

59 Adolescents are particularly vulnerable to the neuropsychological consequences that stem  
60 from sustaining a concussion. A growing base of structural and functional brain imaging studies  
61 indicate that adolescence is an extremely dynamic period of brain development [6,7], and a  
62 mTBI superimposed on a rapidly developing brain and body undergoing puberty reportedly leads  
63 to more severe and persistent symptoms in comparison to younger children and adults [8,9].

64 The current methods used in concussion detection, monitoring, and return-to-play clearance  
65 for adolescent athletes are suboptimal; these tools tend to lack either objectivity, utility, or  
66 feasibility for this population [10,11]. Functional brain imaging studies on concussion to date  
67 have begun to provide some clues regarding potential biomarkers of concussion. Resting-state

68 fMRI studies have examined the disruptions to brain functional connectivity caused by  
69 concussion. This research has shown alterations in both dynamic (i.e., spending less time in a  
70 frontotemporal default mode/limbic brain state) and static measures of functional connectivity  
71 (i.e., altered interhemispheric connectivity, as well as hyperconnected frontal nodes and  
72 hypoconnected posterior nodes in the salience and fronto-parietal networks) relative to healthy  
73 control subjects [12,13].

74 While these findings are informative, the feasibility of performing multiple MRI tests on  
75 young athletes as an objective diagnosis/recovery assessment is not ideal and often not available  
76 in remote regions. Portable and feasible neuroimaging techniques are required that are sensitive  
77 to changes in the brain post impact. Electroencephalography (EEG) has the potential to serve as  
78 an objective diagnostic tool and has been extensively studied in recent years for this purpose.

79 EEG microstate analysis describes the discrete functional cortex-wide states that occur in the  
80 resting-state brain. During the resting state, the brain does not exist in one such state, but shifts  
81 dynamically between 4-7 different EEG “microstate topographies” that are usually stable for  
82 approximately 30-120 milliseconds (ms) before shifting to another state [14–16]. These  
83 microstates show high reliability [17]. This resting-state analysis method provides a lens for  
84 understanding altered dynamics of large scale brain networks, rather than isolated features of the  
85 EEG signal [18]. Importantly, EEG microstates have been shown to have strong associations  
86 with large-scale fMRI resting state brain networks (RSNs) [19]. In addition, EEG microstates  
87 capture subtle temporal dynamics about these functional brain areas and networks that cannot be  
88 captured with resting-state fMRI alone, given the limited temporal resolution of the BOLD  
89 signal. To our knowledge, EEG microstate analysis has been applied by only one group to the  
90 study of concussion [20]. However, this group investigated adults (mean age of 40 yrs) who had

91 sustained a concussion several years prior (0.3 – 16 yrs) and there was no healthy control  
92 comparison group. In this chronic adult group with chronic neurophysiological impairment the  
93 duration of the four canonical microstates (A-D) were negatively correlated with a  
94 neuropsychological impairment index. Only four microstate classes were investigated and only  
95 average duration of each microstate was investigated. To our knowledge, this is the first study  
96 that has examined whether or not EEG microstate dynamics are altered in a adolescent sample in  
97 acute phase of mTBI injury.

98 In the present study, we investigate acute-phase changes in EEG microstate features in a  
99 cohort of adolescent males, with the primary aim to enhance our current understanding of neural  
100 dynamic changes associated with concussion. We hypothesized that mTBI will be associated  
101 with differences in microstate sequences as an indicator of acute changes in temporal dynamic  
102 interplay of large scale brain networks in comparison to healthy controls, and that these changes  
103 will be correlated with concussion symptoms. This pilot study is part of a larger project that aims  
104 to identify potential microstate markers of concussion to enhance the objectivity and reliability  
105 of concussion diagnoses and recovery assessments.

## 106 **Materials and methods**

### 107 *Participants*

108 Male athlete participants with normal or corrected to normal vision between the ages of  
109 10 and 18 years were recruited for this study. Concussed participants received a diagnosis of  
110 concussion from a physician or team doctor. Any participants exhibiting focal neurologic  
111 deficits, pathology and/or those on prescription medications for neurological or psychiatric  
112 conditions were excluded from the study. All participants provided written assent and their  
113 parents gave written informed consent as per the guidelines of the Human Ethics Review Board

114 of the University of British Columbia. The study was approved by the University of British  
115 Columbia Clinical Research Ethics Board (Approval number: H17-02973). The recruitment  
116 period of the study started on March 15, 2019 and is ongoing. The current ethics protocol was  
117 renewed and is valid until October 24, 2025. Eight of the concussed participants had completed  
118 either the Sport Concussion Assessment Tool 3 (SCAT3) or the Child SCAT3 (for children aged  
119 12 and under), a standardized tool widely used for the evaluation of athletes suspected of having  
120 sustained a concussion [21].

### 121 *EEG data collection and preprocessing*

122 Five minutes of eyes closed, resting-state EEG data were collected from individuals using  
123 a 64-channel HydroCel Geodesic Sensor Net (EGI, Eugene, OR). After obtaining assent and  
124 informed consent, participants were seated in an experimental room with controlled lighting  
125 levels and fitted with the EEG cap. They were instructed to minimize movement and remain  
126 seated with their eyes closed. Before initiating the data collection, the electrode-scalp resistance  
127 was ensured to be below 50 k $\Omega$ . The signals were referenced to the vertex (Cz) and recorded at a  
128 sampling rate of 250 Hz. The collected EEG data were imported into Python for preprocessing.  
129 The initial step involved re-referencing the data from the current reference (Cz) to the average of  
130 all channels. This was followed by applying a 4th order Butterworth filter with zero phase shift  
131 for band-pass filtering, and a frequency range of 1 – 50 Hz was kept. This frequency range was  
132 chosen due to excessive noise at frequencies above 50 Hz, which interfered with subsequent  
133 preprocessing steps. Independent component analysis (ICA) was performed using the *infomax*  
134 algorithm and the MNE preprocessing package in Python [22]. To identify and remove noise-  
135 contaminated components, we employed the *ICLabel* algorithm, an automated labeling tool for  
136 independent components [22]. We retained only those components that the algorithm labeled as

137 "Brain" (i.e. probability of the component presenting brain source was higher than artifactual  
138 source).

### 139 *Microstate analysis*

140 For the microstate analysis, we utilized the *Pycrostates* package in Python [23]. Global  
141 Field Potential (GFP) peaks were extracted from individual data sets using the functions  
142 available in the *Pycrostates* package. This process includes calculating the standard deviation of  
143 all channel values at each time point, generating a time series of GFP values. Subsequently,  
144 peaks in this time series were identified using the *Scipy* integrated function, with the minimum  
145 distance between peaks set to the default value of 2 samples. We identified the minimum number  
146 of GFP peaks across all subjects. We then resampled the GFP series for each subject to match  
147 this minimum number. This step was performed to prevent the clustering results from being  
148 biased by variations in the number of peaks across individual data sets and to ensure uniformity.  
149 The GFP peaks were clustered using a modified k-means algorithm, aligning with established  
150 microstate literature.

151 The number of microstates used in previous studies typically ranges from 4 to 7  
152 microstates; at present, there is no consensus on how to determine the optimal number of classes  
153 to use for EEG microstate analysis [19]. Although 4 canonical microstate templates (A to D)  
154 were initially prevalent in the EEG microstate literature, it has been argued that 7 distinct  
155 microstate templates (A to G) best capture the scope of spontaneous electrophysiological activity  
156 topographies that are observed in resting-state EEG studies [24]. We decided that 7 clusters  
157 optimally fit our cohort's data, given that the 7-class solution maximized Global Explained  
158 Variance (GEV), and the alignment of the 7 identified microstates' topographical shapes with  
159 extant literature [25].

160 We aligned the 7 microstates with the established microstate labels (A to G) in the  
161 literature, based on the topographical shapes of the states. We then assigned each time point of  
162 the original dataset to one of the 7 microstates, using a "winner takes all" strategy, a smoothing  
163 parameter of 6 samples (24 ms), and correlation between topographical maps as the similarity  
164 measure. This involved correlating each time point with each microstate and assigning the time  
165 point to the state with the highest correlation, taking smoothing parameter into account but not  
166 taking polarity into account. The smoothing was applied to reduce the influence of rapid  
167 fluctuations, potentially caused by artifacts, and to prevent false identification of microstate  
168 changes.

169 Three measures were extracted from each individual's microstate sequence: average  
170 duration, occurrence rate, and time coverage. First, the average duration of each microstate was  
171 calculated by determining how long the microstate remained unchanged in each sequence. These  
172 individual durations were averaged for each subject, and group-level means, and standard  
173 deviations were extracted. The same method was applied to calculate the occurrence rate of each  
174 microstate (i.e., the number of occurrences per second) and the time coverage (i.e., the  
175 proportion of time each microstate occupied relative to the total recording time). Lastly, we also  
176 extracted the average transition rate per second between microstates for each individual, as the  
177 stability of staying in one state or frequently transitioning between states may be a characteristic  
178 of mTBI. Fig. 1 presents the pipeline.

179  
180 **Fig 1. Study pipeline for microstate extraction from resting-state EEG to differentiate between**  
181 **groups.** The Global Field Power (GFP) time series is computed, and microstate maps are  
182 identified by clustering maps from the local peaks of the GFP. Seven distinct microstates are  
183 identified. The maps are labeled based on their shape and the labeling method introduced in [25].



184 The original EEG time series is backfitted to these microstates using a "winner-takes-all"  
185 algorithm. Key metrics such as microstate duration, occurrence rate, and time coverage are then  
186 extracted for group comparison.

### 187 *Statistical analysis of microstate features*

188 We used permutation statistics for all comparisons. For each feature, we conducted seven  
189 tests (one corresponding to each microstate). We applied a significance level of  $\frac{0.05}{7}$  according to  
190 the Bonferroni method to adjust for multiple comparisons. During each test, we randomized the  
191 subjects from both groups and generated new groups of the same size as the original ones. We  
192 then conducted a t-test on these newly formed random groups. If the t-value from the random  
193 groups exceeded that of the original groups, we added the error rate by one. This procedure was  
194 repeated 10,000 times. The total error rate was then calculated and divided by the number of  
195 permutations. Features and microstates falling below the adjusted significance threshold are  
196 reported.

197 We conducted a multiple regression analysis to understand the relationship between  
198 symptom severity and quantity (as assessed by the SCAT) and microstate feature measures.  
199 Specifically, we used the mean duration and occurrence rate of each microstate as independent  
200 variables, while the reported quantity and severity of symptoms were used as the dependent  
201 variables. To account for multiple comparisons, the significance threshold was adjusted to 0.007.  
202 We did not include time coverage in this analysis, as it can be derived from the average duration  
203 and occurrence rate. If these two features show a significant relationship with symptoms, time  
204 coverage information is unnecessary.

205 **Results**

206 *Demographics*

207 34 male athletes were recruited: n = 14 with concussion and n = 20 with no history of  
208 concussion. Data from two acutely concussed males were removed due to excessive noise  
209 remaining on EEG after preprocessing, leaving a final sample of 32 male adolescent athletes  
210 between the ages of 13 and 18 (Table 1). The total number of symptoms and symptom severity  
211 from the SCAT 3 were reported for 8 participants.

212

213 **Table 1. Demographic and Clinical Characteristics of Study Participants.**

214

|                                       | <b>Mean age (min:max)</b> | <b>SCAT total symptoms<br/>(mean ± SD)</b> | <b>SCAT symptom<br/>severity (mean ± SD)</b> |
|---------------------------------------|---------------------------|--------------------------------------------|----------------------------------------------|
| <b>Healthy Controls (N =<br/>20)</b>  | 16.0 (14:18)              | N/A                                        | N/A                                          |
| <b>Acutely Concussed (N<br/>= 12)</b> | 15.1 (13:18)              | 9.1 ± 6.8 (n = 8)                          | 21.0 ± 20.4 (n = 8)                          |

215

216 *Microstate duration, occurrence rate and time coverage*

217 Seven microstates with topographies similar to those identified in the meta-analysis by  
218 Koenig et al. (2024) were extracted from each subject (Fig. 1). The variance explained by each  
219 microstate series was calculated for individual datasets following the backfitting process (Fig.  
220 2B). The total global explained variance (GEV) was  $58 \pm 12\%$ . The analysis revealed several  
221 significant differences. First, microstate E was significant shorter in the concussed cohort  
222 compared to controls ( $p < 0.001$ ) as shown by significantly lower duration, occurrence rate and

223 time coverage of this microstate in the concussed group (*Cohen's D* = 1.26, 1.08, 1.24  
224 respectively). Additionally, microstate B exhibited a significantly higher mean duration,  
225 occurrence rate, and time coverage ( $p = 0.003, 0.003, < 0.001$ ; *Cohen's D* = 1.06, 1.07, 1.14  
226 respectively) in the concussed group, i.e. there were fewer time points where the topographical  
227 map of the concussed data resembled microstate E, and more time points where it resembled  
228 microstate B (Fig.2B, C and D). We visualized these findings in two ways. In Fig. 2B, the  
229 average duration of microstates B and E is shown for each participant as individual data points,  
230 and by a bar plot comparing the group averages. In Fig. 3, we present the distribution of the  
231 duration for microstates B (Fig. 3 left) and E (Fig. 3 right). Specifically, each time one of these  
232 microstates occurred, its duration was recorded across data from all subjects. We then tested  
233 whether the distributions of these duration values significantly differed between the two cohorts  
234 using the Kolmogorov-Smirnov test and observed significant differences ( $p < 0.001$ ).

235

236 **Fig. 2. Microstate global variance, and comparative metrics in healthy vs. concussed participants:**

237 (A) Total global explained variance (GEV) of each microstate sequence, with each dot representing  
238 individual datasets. (B), (C) and (D) Bar plots representing the three key microstate measures: average  
239 duration, average occurrence rate, and time coverage, respectively. Healthy (blue,  $n = 20$ ) and concussed  
240 (orange,  $n = 12$ ) groups are compared, with dots representing individual data points. Significant  
241 differences in mean duration, occurrence rate, and time coverage of microstates B and E are observed.  
242 Overall, microstate E had a significantly lower duration, occurrence rate and time coverage in the  
243 concussed group compared to controls ( $p < 0.001$ ). Additionally, microstate B exhibited a significantly  
244 higher mean duration, occurrence rate, and time coverage in the concussed group ( $p = 0.003$ ). AC = Acute  
245 concussed; HC = Healthy Controls.

246

247 **Fig 3. Distribution of microstate B and E durations across all occurrences.** The distributions for  
248 microstate B and E durations are shown for both the HC (healthy control) and AC (acutely concussed)  
249 groups. Significant differences were observed between the duration distributions, with  $p < 0.001$  ( $D =$   
250  $0.01$  for microstate B,  $D = 0.06$  for microstate E).

#### 251 *Microstate transition rate*

252 Transitions were recorded for each second of the data. The total number of transitions per  
253 second was averaged over the entire data length for each individual. Interestingly, we observed  
254 higher variability in the number of transitions among the control group, though their average and  
255 median values were lower compared to the concussed group. However, this difference was not  
256 statistically significant (Fig. 4).

257

258 **Fig 4. Rate of transitions in microstate sequences.** (A) Shows a spike for each transition from one  
259 microstate to another within a 4-second time window for example subgroups. (B) Shows a box plot  
260 comparing the transition rates per second between the healthy control (HC) and acutely concussed (AC)  
261 groups, with individual data points representing the average number of transitions per second for each  
262 participant in the cohort. The difference between the two groups was not statistically significant.

263

#### 264 *Concussion symptoms related to microstate features*

265 Among the eight concussed athletes who completed the SCAT, microstate E had a  
266 significant negative linear relationship with the SCAT symptom severity measure ( $p = 0.006$ ,  $F$   
267  $= 15.72$ ). This model indicates that increased symptom severity is associated with shorter  
268 duration and lower occurrence rates of microstate E.

269

270 **Fig 5. Multiple regression model.** The average duration and occurrence rate of microstate E are used as  
271 independent variables, and symptom severity is used as the dependent variable. Data from eight  
272 concussed participants were included in this model due to the absence of SCAT information from other  
273 concussed individuals. The model demonstrates a statistically significant linear relationship between the  
274 duration and occurrence rate of microstate E and the reported symptom severity ( $p = 0.006$ ,  $F = 15.72$ ).

## 275 **Discussion**

276 In the present study, we applied EEG microstate analysis to study the changes associated  
277 with acute sport-related concussion in a small cohort of adolescent male athletes.

278 As hypothesized, we observed disturbed functional dynamics in the resting-state brain microstate  
279 of concussed adolescent participants relative to healthy control adolescent participants. Our  
280 findings show specific changes in microstates E and B: there was a significant decrease in the  
281 presence of microstate E and a significant increase in the presence of microstate B in our  
282 concussed sample across three microstate measures examined. Specifically, microstate B occurred  
283 more frequently, lasted longer, and as a result covered a higher proportion of the total time; in  
284 contrast, this pattern was the opposite for microstate E. Interestingly, we also observed that the  
285 decreased occurrence rate and average duration of microstate E was associated with increased  
286 symptom severity within the concussed group. We did not find any significant differences in  
287 microstates transition rate between the groups.

288 EEG microstate analysis offers insights into temporal changes in the spatial organization  
289 of brain activity during rest. Specifically, this type of analysis relies on dynamic patterns of brain  
290 connectivity as opposed to a static measure of brain activity. Essentially, resting-state EEG scalp  
291 topographies tend to aggregate into a limited number of prototypical spatial distributions. These  
292 distributions are replicable both within and across individuals and have been extensively studied  
293 in the literature [17,25]. Typically, these topographical distributions are labeled A to G based on

294 their maps. While labeling systems may vary across studies, we compared our results with those  
295 from studies that utilized similar topographical maps, though these studies report different labels.  
296 Our labeling system is based on the unifying work of Tarailis et al. [26] which facilitates cross-  
297 study comparisons.

298 Our findings indicate that the concussed group exhibits a reduced duration, occurrence rate  
299 and time coverage of microstate E. Microstate E is characterized by a topography with a centro-  
300 parietal maximum [26] and has been associated with activity in the default mode network (DMN)  
301 and the salience network (SN) [24,26]. Additionally, the scores of symptom severity showed a  
302 significant negative correlation with the duration and occurrence of this microstate. Given the  
303 critical role of the networks associated with microstate E in modulating both external and internal  
304 attention, we also observed a similar relationship in the concussed group where symptom severity  
305 which was linked to acute cognitive and somatic impairments were associated with characteristics  
306 of microstate E. Previous research has shown that sleep deprivation [27] and acute drug  
307 intoxication [28] are similarly associated with higher transition probability from microstate E to  
308 other microstates and reduced duration and coverage of microstate E respectively. Self-reported  
309 comfort at rest, on the other hand, has been associated with an increased duration of microstate E,  
310 which may be due to increased self-referential processing associated with the DMN [29]. These  
311 findings align well with what we observe in duration, occurrence and time coverage of microstate  
312 E. Although not statistically significant, we also observed a decrease in the duration, occurrence  
313 rate and time coverage of microstate D in the concussed group relative to the healthy control group.

314 Microstate D has been shown to primarily be associated with the frontoparietal executive  
315 control network (ECN) (e.g., activity in the right inferior parietal lobe and the right middle and  
316 superior frontal gyri) [24,30]. Given that the salience network is thought to modulate the dynamic

317 interaction between the ECN and DMN [32], it is interesting that we observed a reduced presence  
318 of both microstates E and D in the concussed cohort, indicating potential impairment in key resting  
319 state networks related to attention regulation and cognitive control. Finally, a reduced duration of  
320 microstate E is consistent with the results of resting-state fMRI studies that have studied  
321 disruptions to dynamic functional connectivity in the brain as a result of concussion. Concussed  
322 pediatric participants have been observed to spend less time in a frontotemporal default  
323 mode/limbic brain state relative to their healthy control peers [13].

324 In contrast, microstate B characterized by a topography with a left frontal to right  
325 posterior configuration has been shown to be associated with the visual processing regions of the  
326 brain and particularly of activity in the left and right occipital cortices, including primary visual  
327 cortex [24,26]. It is possible that an altered balance of sensory processing activity in the brain  
328 (i.e., more activity in the visual imagery RSN), as a result of concussion, relates to acute  
329 cognitive impairments associated with concussion. Future research should explore, how  
330 concussion intervention alters the processing of various sensory inputs in the brain, and whether  
331 or not an imbalance in brain activity related to the processing of different sensory inputs (e.g.,  
332 compensatory hyperactivity in one sensory modality) is a cause or effect of common concussion  
333 symptoms such as mental fatigue, attentional deficits, and memory impairment. It is also worth  
334 noting that in the aforementioned sleep deprivation study [27] and acute drug intoxication study  
335 [28], not only was there a decreased presence of microstate E, but also a higher transition  
336 probability from microstate E to microstate B. Perhaps concussion creates a state of impairment  
337 that prompts a similar neurobiological compensatory response to sleep deprivation and alcohol  
338 intoxication, where the brain is forced to prioritize bottom-up sensory processing (i.e., microstate

339 B) over internally-oriented networks or higher-order top-down cognitive networks (i.e.,  
340 microstates E and D) [28].

341 We also analyzed the number of transitions between microstates for each participant.  
342 This measure reflects the brain's ability to switch between different functional states, which is  
343 crucial for maintaining efficient cognitive functioning. In a previous fMRI study, we observed  
344 reduced transitions between functional states in individuals with a concussion, suggesting  
345 cognitive rigidity [33]. However, we did not replicate this finding in the current study. A higher  
346 transition rate could potentially indicate neural instability or increased metabolic cost, which  
347 may also be linked to concussion pathology. Nevertheless, this observation did not reach  
348 statistical significance. To draw more definitive conclusions, future studies should explore this  
349 further with larger sample sizes and greater statistical power.

### 350 **Limitations and methodological considerations**

351 Our study results have limited generalizability as we were only able to include a small  
352 cohort of male adolescent participants. Future studies will build upon the results of the present  
353 study by performing microstate analysis on a larger and more diverse sample and in a  
354 longitudinal design to address normal within-subject variabilities. An additional limitation is that  
355 only 8 of the 12 concussed subjects had completed the SCAT3, reducing the power of the  
356 correlation analysis performed between SCAT symptom quantity/severity scores and microstate  
357 features.

### 358 **Conclusion**

359 In conclusion, using resting-state EEG in conjunction with microstate analysis, we  
360 observed significant disruptions in the dynamic interplay of large-scale brain networks in acutely  
361 concussed adolescent male athletes compared to their healthy control peers. EEG microstates



362 provide a readily accessible and replicable method to study the effects of concussion on whole-  
363 brain network dynamics with high temporal resolution. This study aids in the effort to identify  
364 an objective biomarker for concussion, which is direly needed for the most accurate diagnosis  
365 and monitoring of this subtle and multifaceted injury.

366

### 367 **Acknowledgements**

368 We would like to express our gratitude to the participants of this study, whose  
369 cooperation and commitment made this research possible.

370

371

372

373

374

375

376

377

378

379

380

381

382

383

384

385

386

387

388 **References**

389 1. Sussman ES, Pendharkar AV, Ho AL, Ghajar J. Mild traumatic brain injury and concussion:

390 terminology and classification. *Handb Clin Neurol*. 2018;158:21–4.

391 2. D’Lauro C, Jones E, Swope L, Anderson M, Broglio S, Schmidt J. Under-representation of

392 female athletes in research informing influential concussion consensus and position statements:

393 an evidence review and synthesis. *British Journal of Sports Medicine*. 2022;56:bjsports-2021.

394 3. Rubin TG, Lipton ML. Sex Differences in Animal Models of Traumatic Brain Injury. *J Exp*

395 *Neurosci*. 2019;13:1179069519844020.

396 4. Champagne AS, Yao X, McFaull SR, Saxena S, Gordon KR, Babul S, et al. Self-reported

397 concussions in Canada: A cross-sectional study. *Health Rep*. 2023;34:17–28.

398 5. Zhang AL, Sing DC, Rugg CM, Feeley BT, Senter C. The Rise of Concussions in the

399 Adolescent Population. *Orthopaedic Journal of Sports Medicine*. 2016;4:2325967116662458.

400 6. Ferschmann L, Bos MGN, Herting MM, Mills KL, Tamnes CK. Contextualizing adolescent

401 structural brain development: Environmental determinants and mental health outcomes. *Current*

402 *Opinion in Psychology*. 2022;44:170–6.

403 7. Smit DJA, Boersma M, Schnack HG, Micheloyannis S, Boomsma DI, Pol HEH, et al. The

404 Brain Matures with Stronger Functional Connectivity and Decreased Randomness of Its

405 Network. *PLOS ONE*. 2012;7:e36896.

- 406 8. Baillargeon A, Lassonde M, Leclerc S, Elleberg D. Neuropsychological and  
407 neurophysiological assessment of sport concussion in children, adolescents and adults. *Brain Inj.*  
408 2012;26:211–20.
- 409 9. Davis GA, Anderson V, Babl FE, Gioia GA, Giza CC, Meehan W, et al. What is the  
410 difference in concussion management in children as compared with adults? A systematic review.  
411 *Br J Sports Med.* 2017;51:949–57.
- 412 10. Daly E, Pearce AJ, Finnegan E, Cooney C, McDonagh M, Scully G, et al. An assessment of  
413 current concussion identification and diagnosis methods in sports settings: a systematic review.  
414 *BMC Sports Science, Medicine and Rehabilitation.* 2022;14:125.
- 415 11. Damji F, Babul S. Improving and standardizing concussion education and care: a Canadian  
416 experience. *Concussion.* 2018;3:CNC58.
- 417 12. Shafi R, Crawley AP, Tartaglia MC, Tator CH, Green RE, Mikulis DJ, et al. Sex-specific  
418 differences in resting-state functional connectivity of large-scale networks in postconcussion  
419 syndrome. *Sci Rep.* 2020;10:21982.
- 420 13. van der Horn HJ, Ling JM, Wick TV, Dodd AB, Robertson-Benta CR, McQuaid JR, et al.  
421 Dynamic Functional Connectivity in Pediatric Mild Traumatic Brain Injury. *Neuroimage.*  
422 2024;285:120470.
- 423 14. Lehmann D. Brain Electric Microstates and Cognition: The Atoms of Thought. In: John ER,  
424 Harmony T, Prichep LS, Valdés-Sosa M, Valdés-Sosa PA, editors. *Machinery of the Mind: Data,*  
425 *Theory, and Speculations About Higher Brain Function [Internet].* Boston, MA: Birkhäuser;

- 426 1990 [cited 2024 Apr 24]. p. 209–24. Available from: [https://doi.org/10.1007/978-1-4757-1083-](https://doi.org/10.1007/978-1-4757-1083-0_10)  
427 0\_10
- 428 15. Lehmann D, Pascual-Marqui RD, Michel C. EEG microstates. *Scholarpedia*. 2009;4:7632.
- 429 16. Katayama H, Gianotti LRR, Isotani T, Faber PL, Sasada K, Kinoshita T, et al. Classes of  
430 Multichannel EEG Microstates in Light and Deep Hypnotic Conditions. *Brain Topogr*.  
431 2007;20:7–14.
- 432 17. Khanna A, Pascual-Leone A, Michel CM, Farzan F. Microstates in resting-state EEG: current  
433 status and future directions. *Neurosci Biobehav Rev*. 2015;49:105–13.
- 434 18. Michel CM, Koenig T. EEG microstates as a tool for studying the temporal dynamics of  
435 whole-brain neuronal networks: A review. *NeuroImage*. 2018;180:577–93.
- 436 19. da Cruz JR, Favrod O, Roinishvili M, Chkonia E, Brand A, Mohr C, et al. EEG microstates  
437 are a candidate endophenotype for schizophrenia. *Nat Commun*. 2020;11:3089.
- 438 20. Corradini PL, Persinger MA. Spectral power, source localization and microstates to quantify  
439 chronic deficits from ‘mild’ closed head injury: Correlation with classic neuropsychological  
440 tests. *Brain Injury*. 2014;28:1317–27.
- 441 21. McCrory P, Meeuwisse WH, Aubry M, Cantu B, Dvorák J, Echemendia RJ, et al. Consensus  
442 statement on concussion in sport: the 4th International Conference on Concussion in Sport held  
443 in Zurich, November 2012. *Br J Sports Med*. 2013;47:250–8.

- 444 22. Li A, Feitelberg J, Saini AP, Höchenberger R, Scheltienne M. MNE-ICALabel:  
445 Automatically annotating ICA components with ICLabel in Python. *Journal of Open Source*  
446 *Software*. 2022;7:4484.
- 447 23. Férat V, Scheltienne M, Brunet D, Ros T, Michel C. Pycrostates: a Python library to study  
448 EEG microstates. *Journal of Open Source Software*. 2022;7:4564.
- 449 24. Custo A, Van De Ville D, Wells WM, Tomescu MI, Brunet D, Michel CM.  
450 Electroencephalographic Resting-State Networks: Source Localization of Microstates. *Brain*  
451 *Connect*. 2017;7:671–82.
- 452 25. Koenig T, Diezig S, Kalburgi SN, Antonova E, Artoni F, Brechet L, et al. EEG-Meta-  
453 Microstates: Towards a More Objective Use of Resting-State EEG Microstate Findings Across  
454 Studies. *Brain Topogr*. 2024;37:218–31.
- 455 26. Tarailis P, Koenig T, Michel CM, Griškova-Bulanova I. The Functional Aspects of Resting  
456 EEG Microstates: A Systematic Review. *Brain Topogr* [Internet]. 2023 [cited 2024 Feb 14];  
457 Available from: <https://doi.org/10.1007/s10548-023-00958-9>
- 458 27. Ke M, Li J, Wang L. Alteration in Resting-State EEG Microstates Following 24 Hours of  
459 Total Sleep Deprivation in Healthy Young Male Subjects. *Front Hum Neurosci* [Internet]. 2021  
460 [cited 2024 Aug 24];15. Available from: [https://www.frontiersin.org/journals/human-](https://www.frontiersin.org/journals/human-neuroscience/articles/10.3389/fnhum.2021.636252/full)  
461 [neuroscience/articles/10.3389/fnhum.2021.636252/full](https://www.frontiersin.org/journals/human-neuroscience/articles/10.3389/fnhum.2021.636252/full)
- 462 28. Schiller B, Heinrichs M, Beste C, Stock A-K. Acute alcohol intoxication modulates the  
463 temporal dynamics of resting electroencephalography networks. *Addict Biol*. 2021;26:e13034.

- 464 29. Tarailis P, Šimkutė D, Koenig T, Griškova-Bulanova I. Relationship between Spatiotemporal  
465 Dynamics of the Brain at Rest and Self-Reported Spontaneous Thoughts: An EEG Microstate  
466 Approach. *Journal of Personalized Medicine*. 2021;11:1216.
- 467 30. Britz J, Van De Ville D, Michel CM. BOLD correlates of EEG topography reveal rapid  
468 resting-state network dynamics. *NeuroImage*. 2010;52:1162–70.
- 469 31. Seitzman BA, Abell M, Bartley SC, Erickson MA, Bolbecker AR, Hetrick WP. Cognitive  
470 manipulation of brain electric microstates. *Neuroimage*. 2017;146:533–43.
- 471 32. Menon V, Uddin LQ. Saliency, switching, attention and control: a network model of insula  
472 function. *Brain Struct Funct*. 2010;214:655–67.
- 473 33. Muller AM, Virji-Babul N. Stuck in a State of Inattention? Functional Hyperconnectivity as  
474 an Indicator of Disturbed Intrinsic Brain Dynamics in Adolescents With Concussion: A Pilot  
475 Study. *ASN Neuro*. 2018;10:1759091417753802.

476

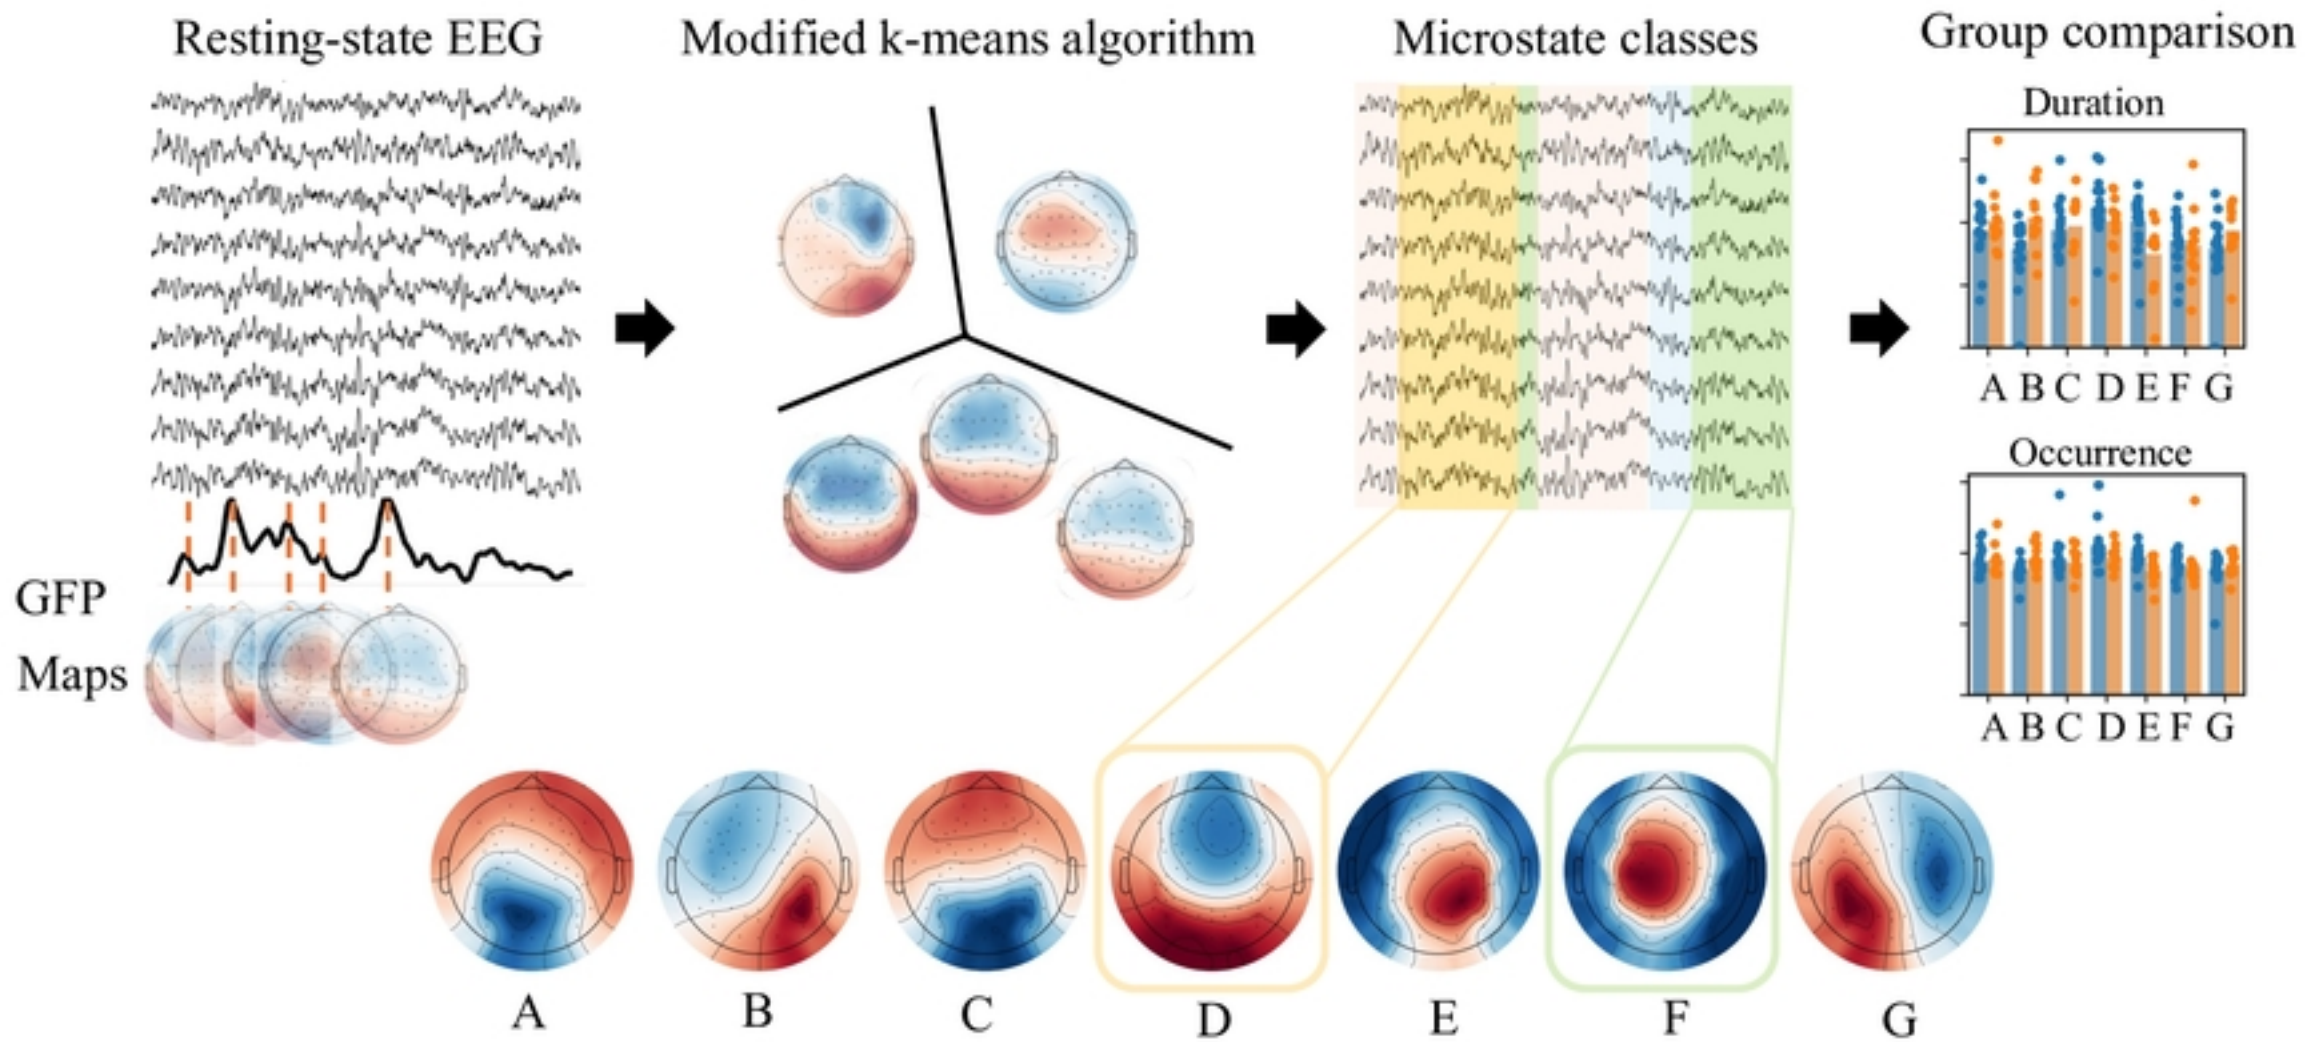

Figure 1

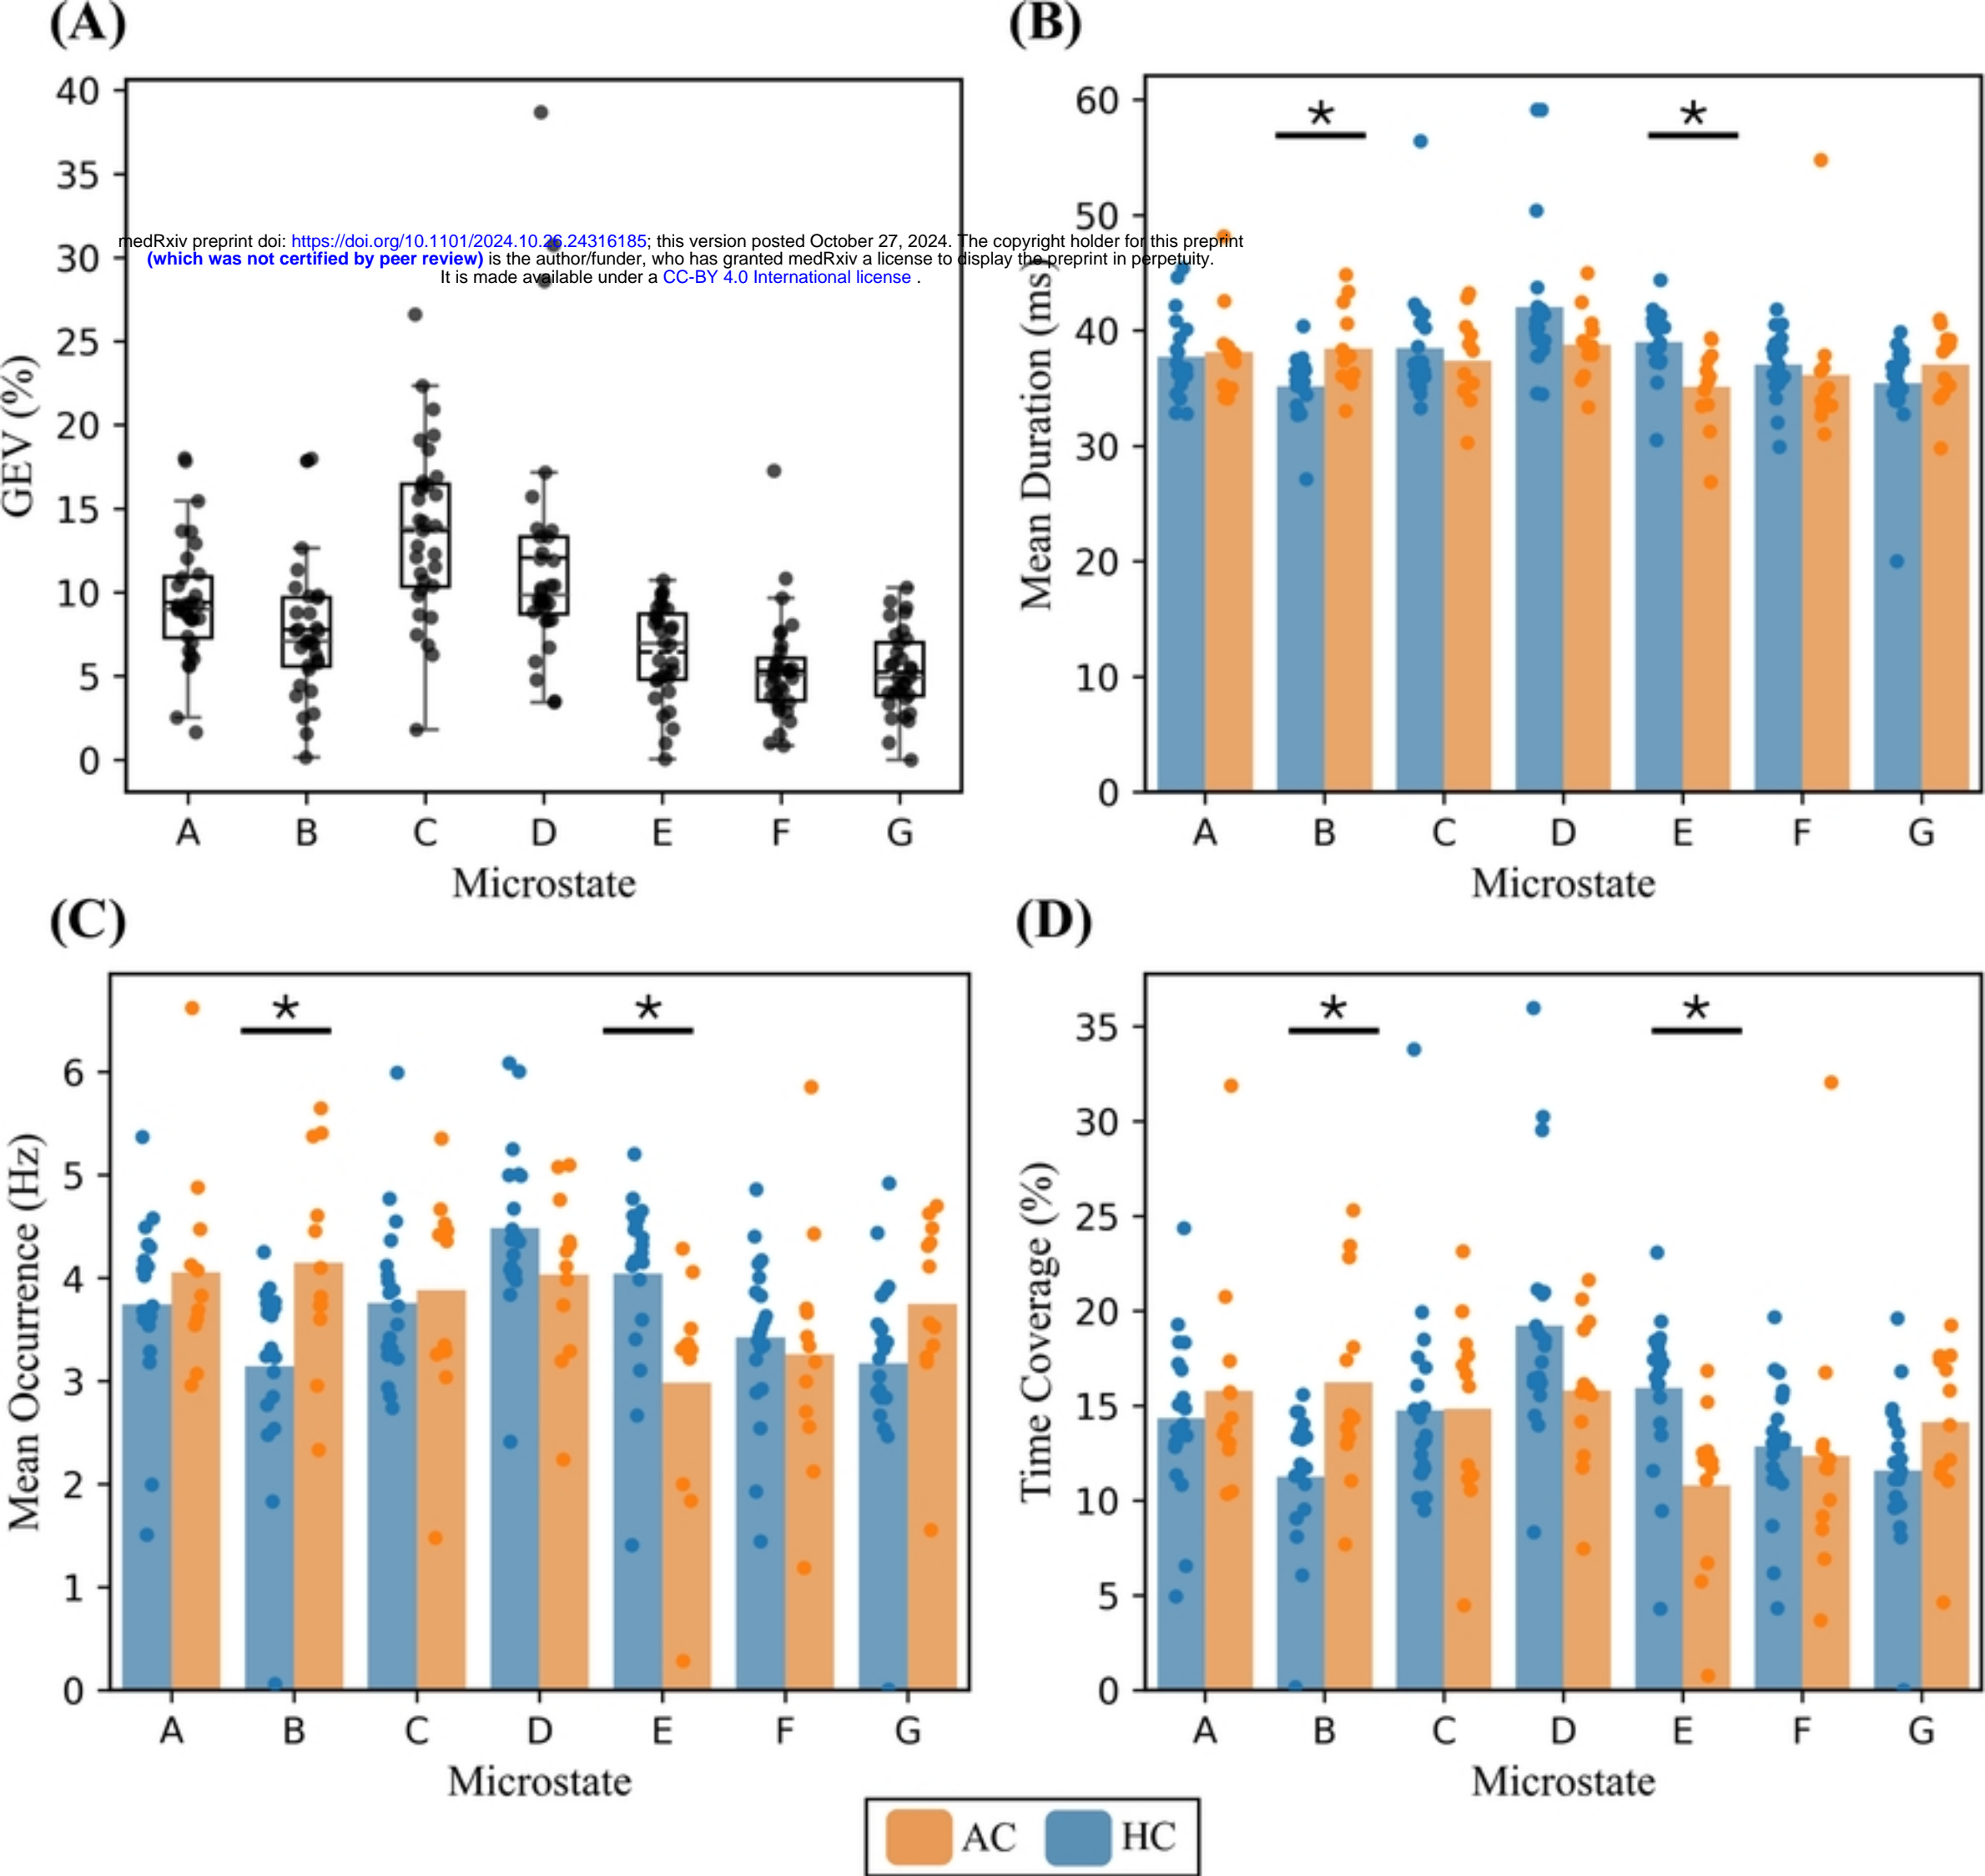

Figure 2



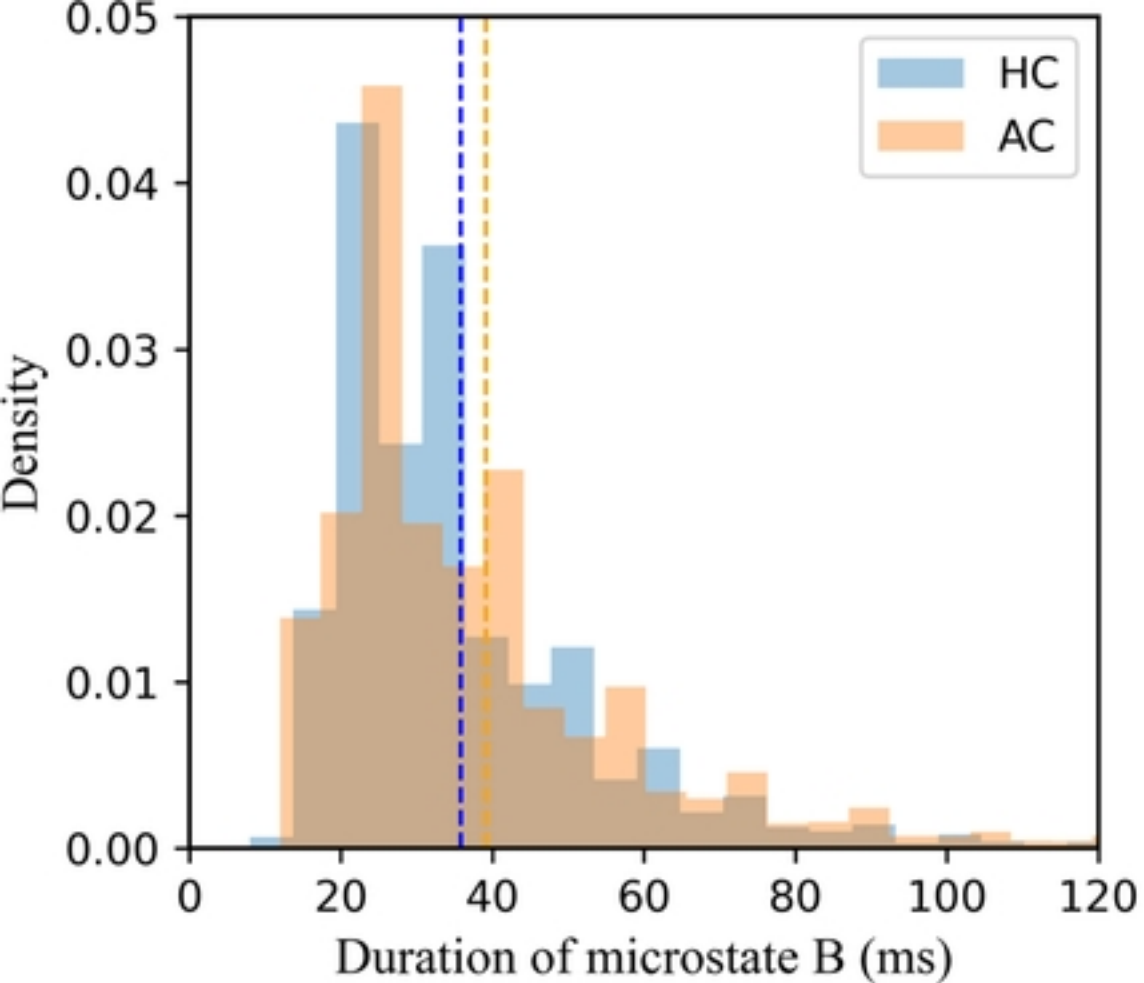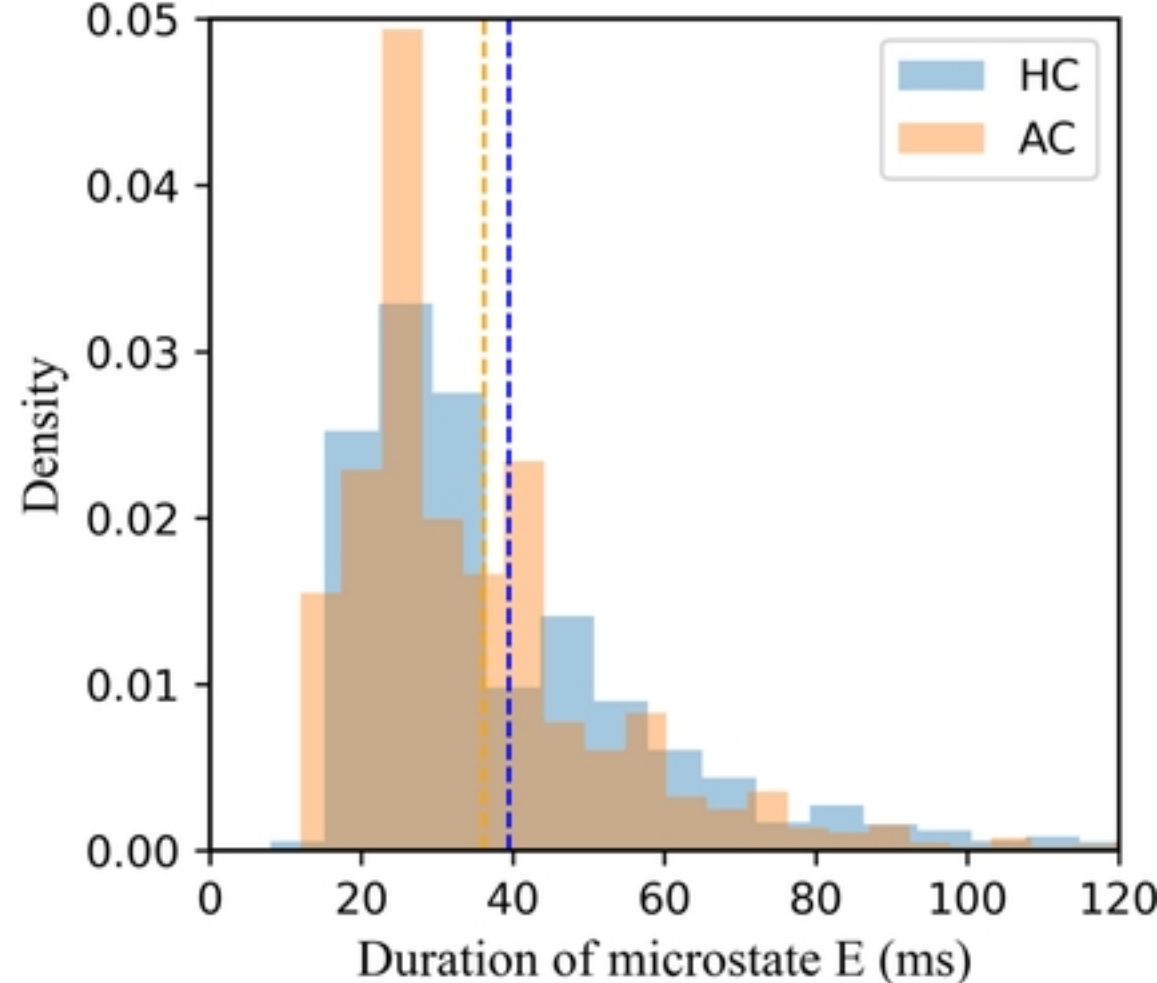

Figure 3

**(A)**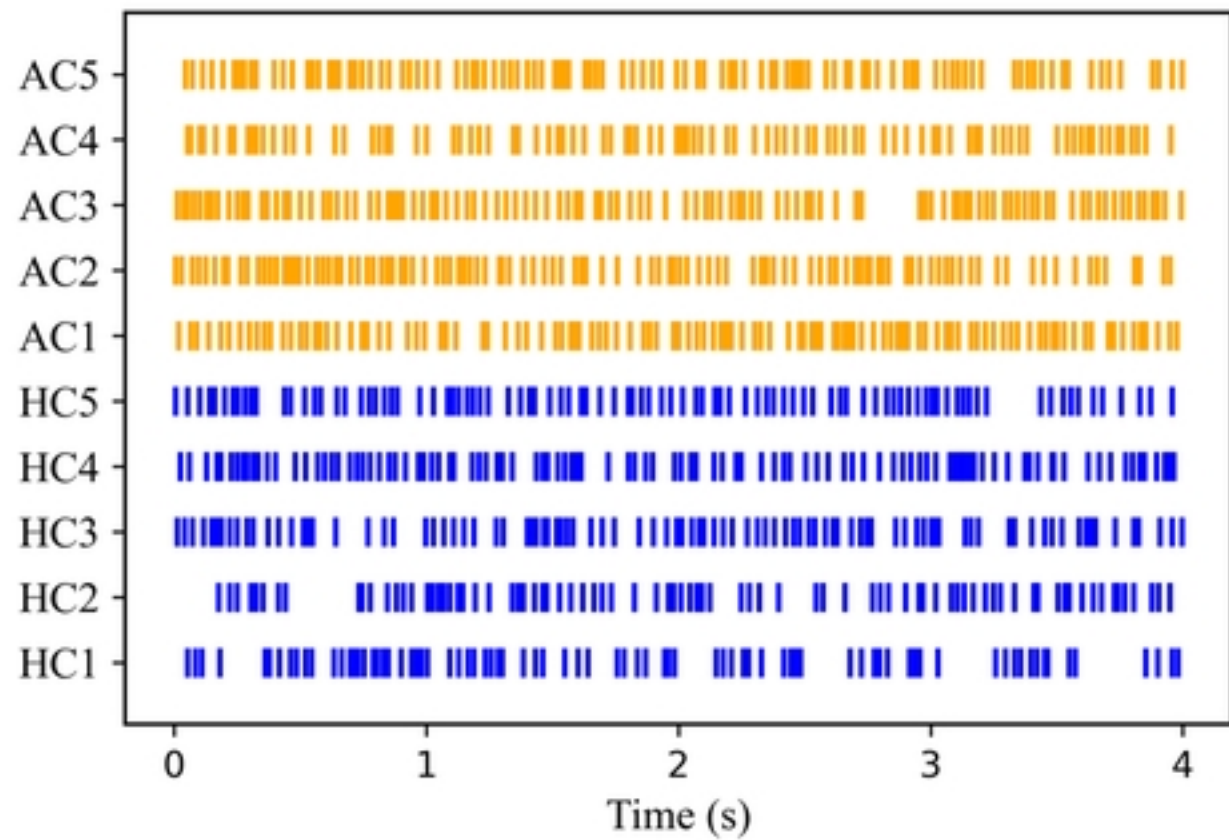**(B)**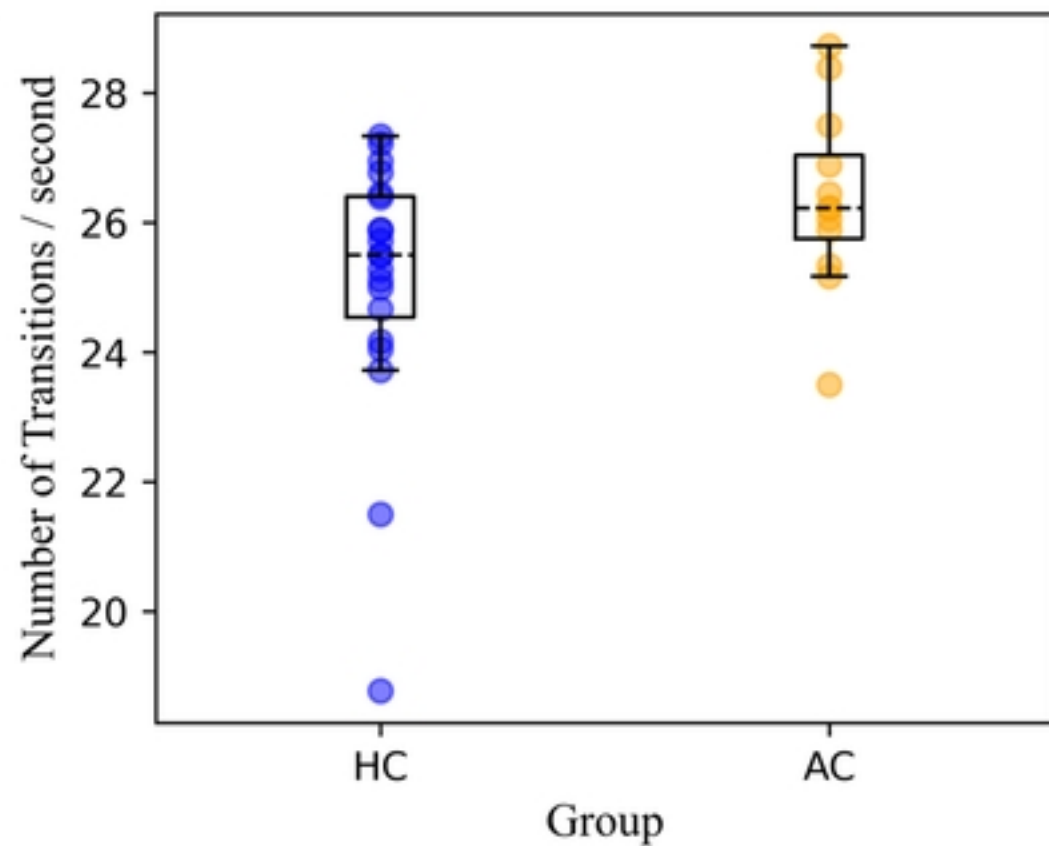

Figure 4

# Microstate E vs Symptoms Severity

medRxiv preprint doi: <https://doi.org/10.1101/2024.10.26.24316185>; this version posted October 27, 2024. The copyright holder for this preprint (which was not certified by peer review) is the author/funder, who has granted medRxiv a license to display the preprint in perpetuity. It is made available under a [CC-BY 4.0 International license](https://creativecommons.org/licenses/by/4.0/).

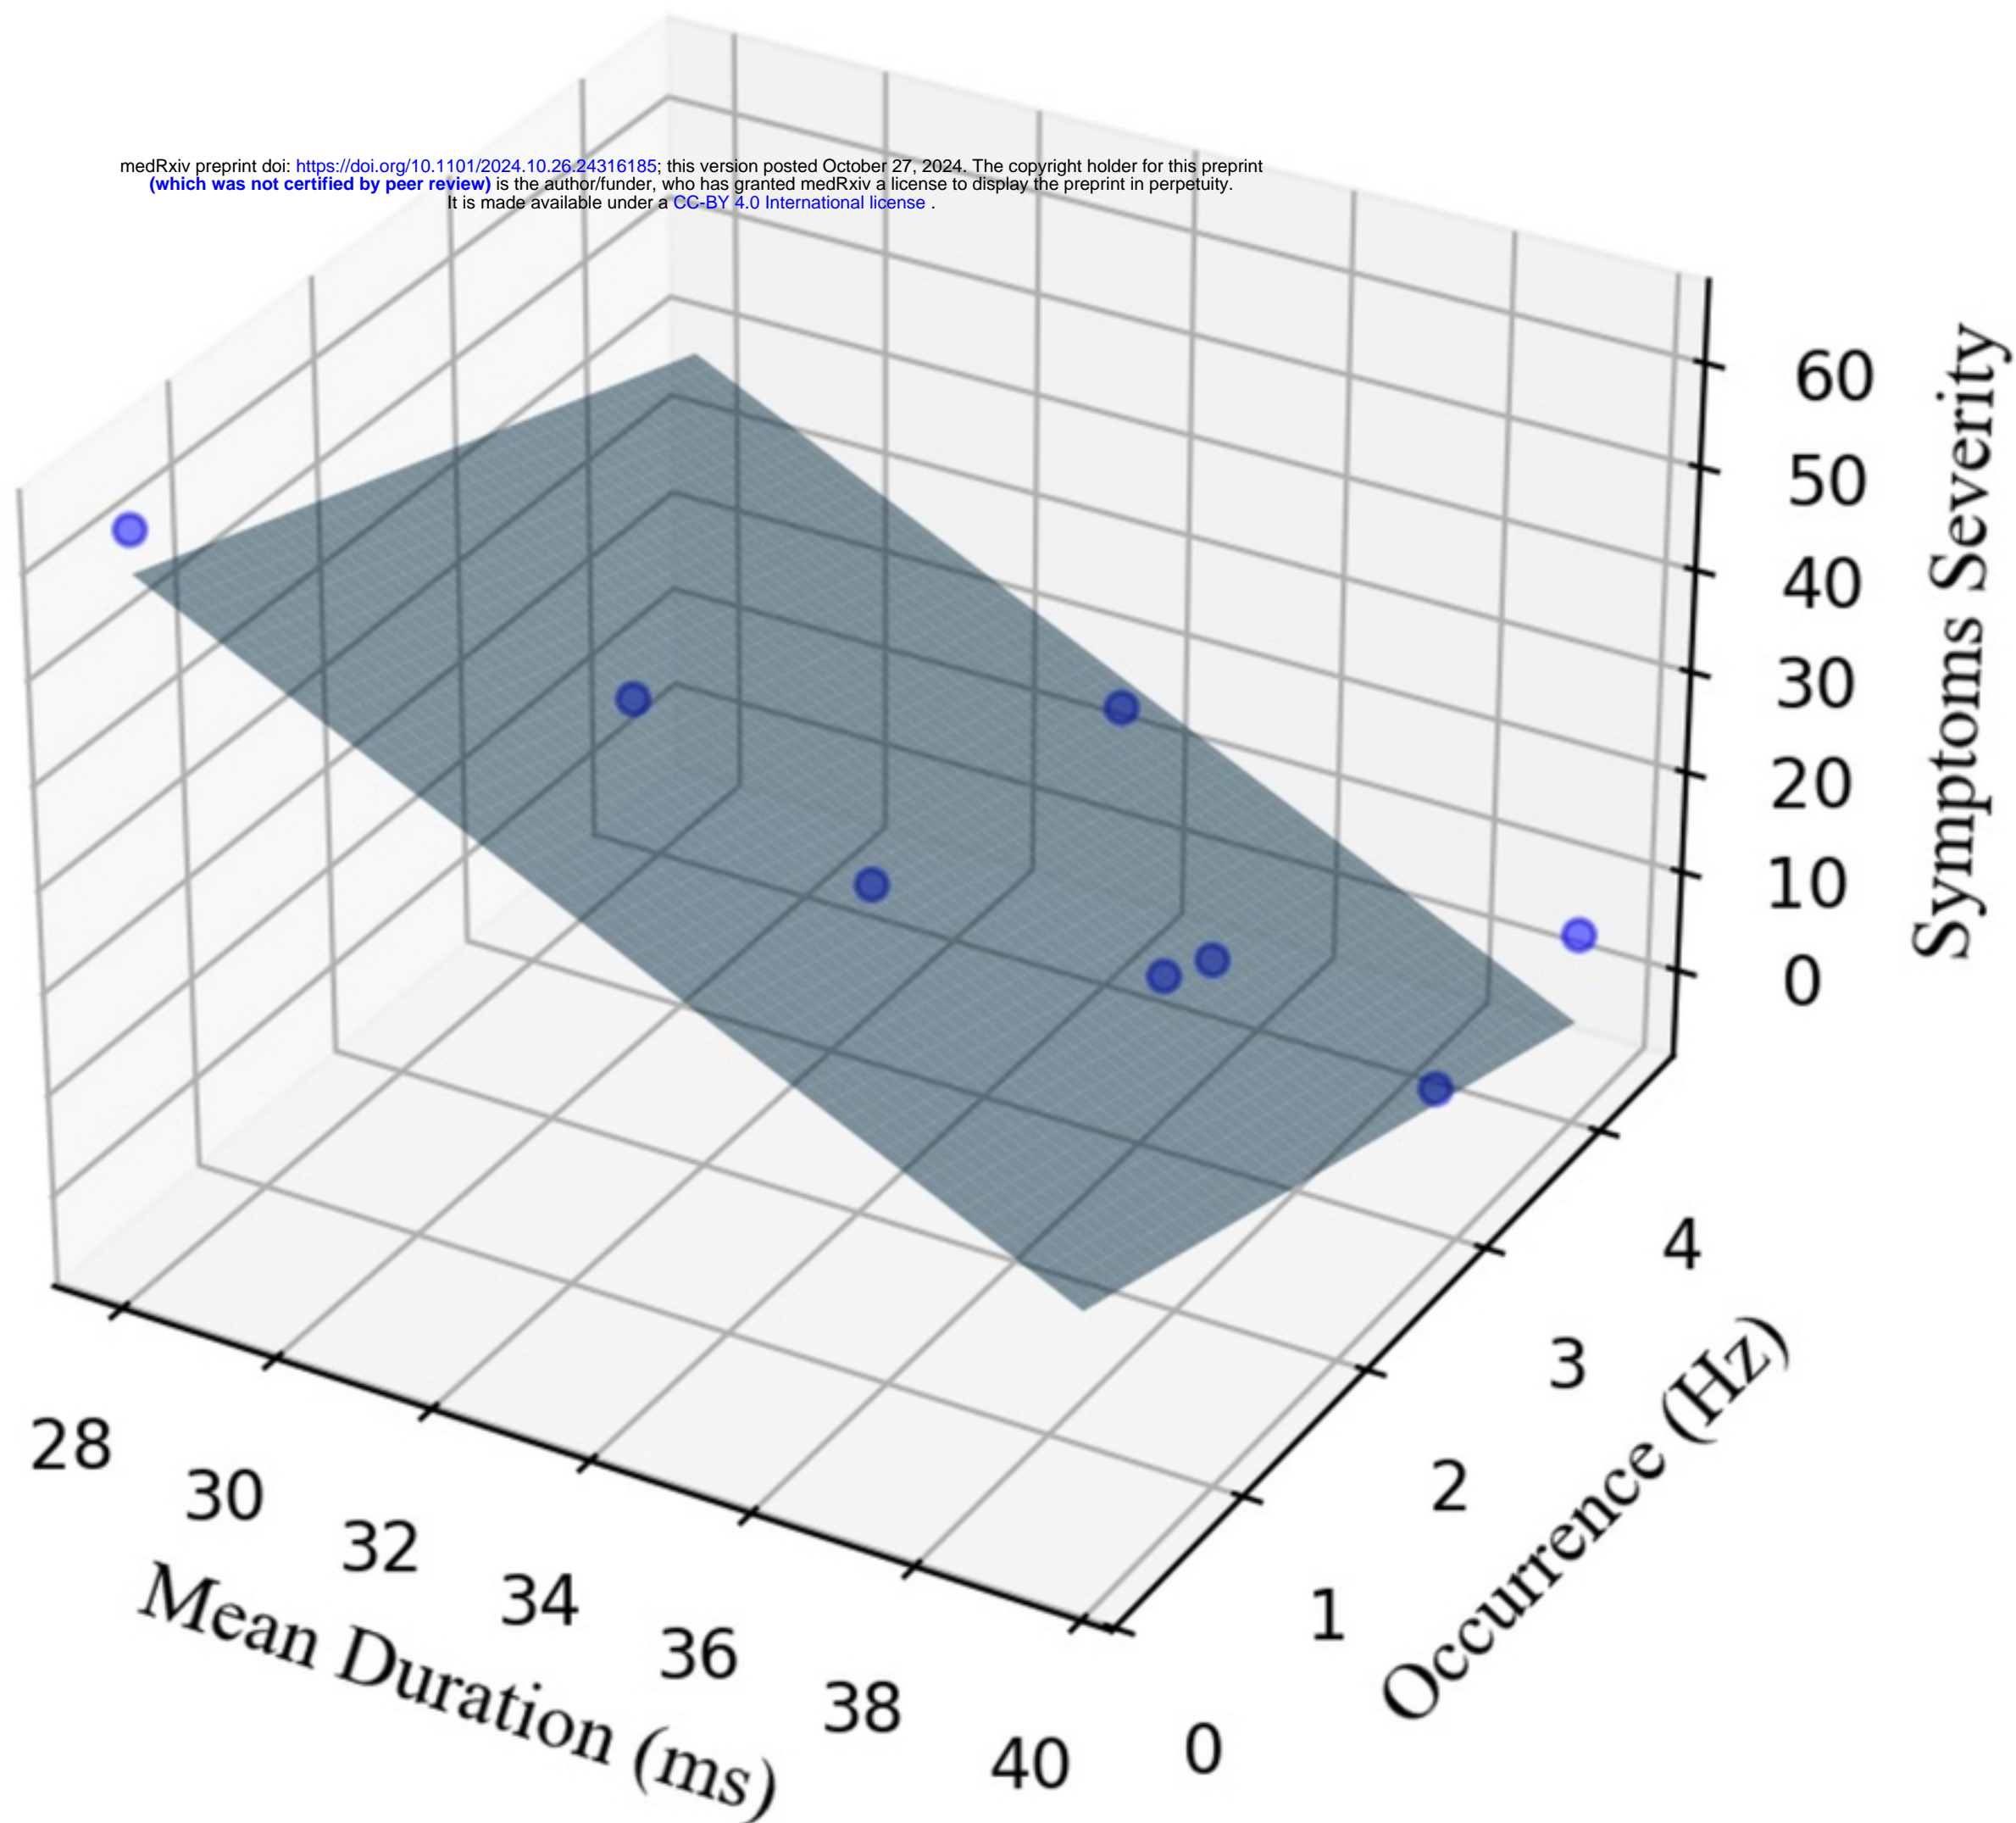

Figure 5
